# Supplementary material for: Accurate rare variant phasing of whole-genome and whole-exome sequencing data in the UK Biobank
Source: Springer Nature journal article supplement (doi:10.1038/s41588-023-01415-w), 2023-06-29
Supplement: 41588_2023_1415_MOESM1_ESM.pdf [file 41588_2023_1415_MOESM1_ESM.pdf]

## Table of content

|                                                                                                                                                                        |   |
|------------------------------------------------------------------------------------------------------------------------------------------------------------------------|---|
| Supplementary Figure 1: Computation of phasing probabilities.....                                                                                                      | 1 |
| Supplementary Figure 2: Switch Error rates in the WGS data.....                                                                                                        | 2 |
| Supplementary Figure 3: Validation of WGS phasing using trios only.....                                                                                                | 3 |
| Supplementary Figure 4: Validation of WGS phasing across multiple sample sizes....                                                                                     | 5 |
| Supplementary Table 1. Summary statistics of the phased datasets.....                                                                                                  | 6 |
| Supplementary Table 2. Running times and cost estimates for phasing WGS data with SHAPEIT5 or Beagle5.4 on the Research Analysis Platform (RAP) of the UK Biobank..... | 6 |
| Supplementary Table 3. Running times and memory usage for phasing WGS data with SHAPEIT5 or Beagle5.4 on the Research Analysis Platform (RAP) of the UK Biobank.....   | 7 |

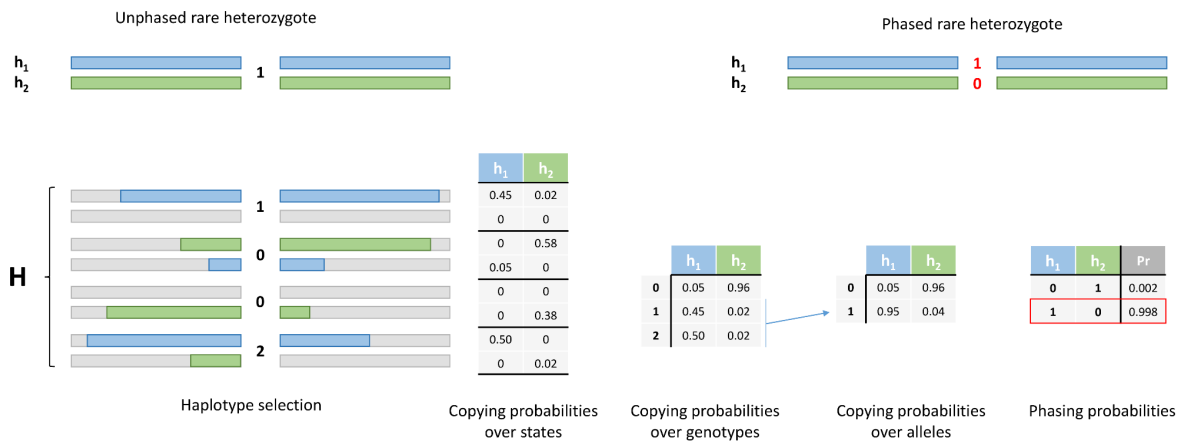

### Supplementary Figure 1: Computation of phasing probabilities.

From left to right. A target sample is phased at common variants (haplotypes  $h_1$  and  $h_2$ ) and is heterozygote for a rare variant (genotype = 1). Haplotypes in the conditioning set  $H$  are chosen so that they share long matches with the target (in green and blue). At the rare variant, they are either homozygous for the major allele (genotype = 0), for the minor allele (genotype = 2) or heterozygous (genotype = 1). The haploid Li and Stephens model, as used for genotype imputation, is applied to get copying probabilities, i.e., probabilities that  $h_1$  and  $h_2$  copy for each haplotype in  $H$  at the rare variant. These probabilities are summed across the possible genotypes at the rare variant. Then, homozygosity is forced at heterozygous genotypes so that the probabilities can be summed per allele (0 or 1) at the rare variant, i.e. the probabilities that  $h_1$  and  $h_2$  carry the alleles 0 or 1 at the rare variant. Finally, these imputation probabilities are multiplied in order to get phasing probabilities: (i)  $h_1 = 0$  and  $h_2 = 1$  versus (ii)  $h_1 = 1$  and  $h_2 = 0$ . The most likely phase is then assigned to get the phasing of the rare variant.

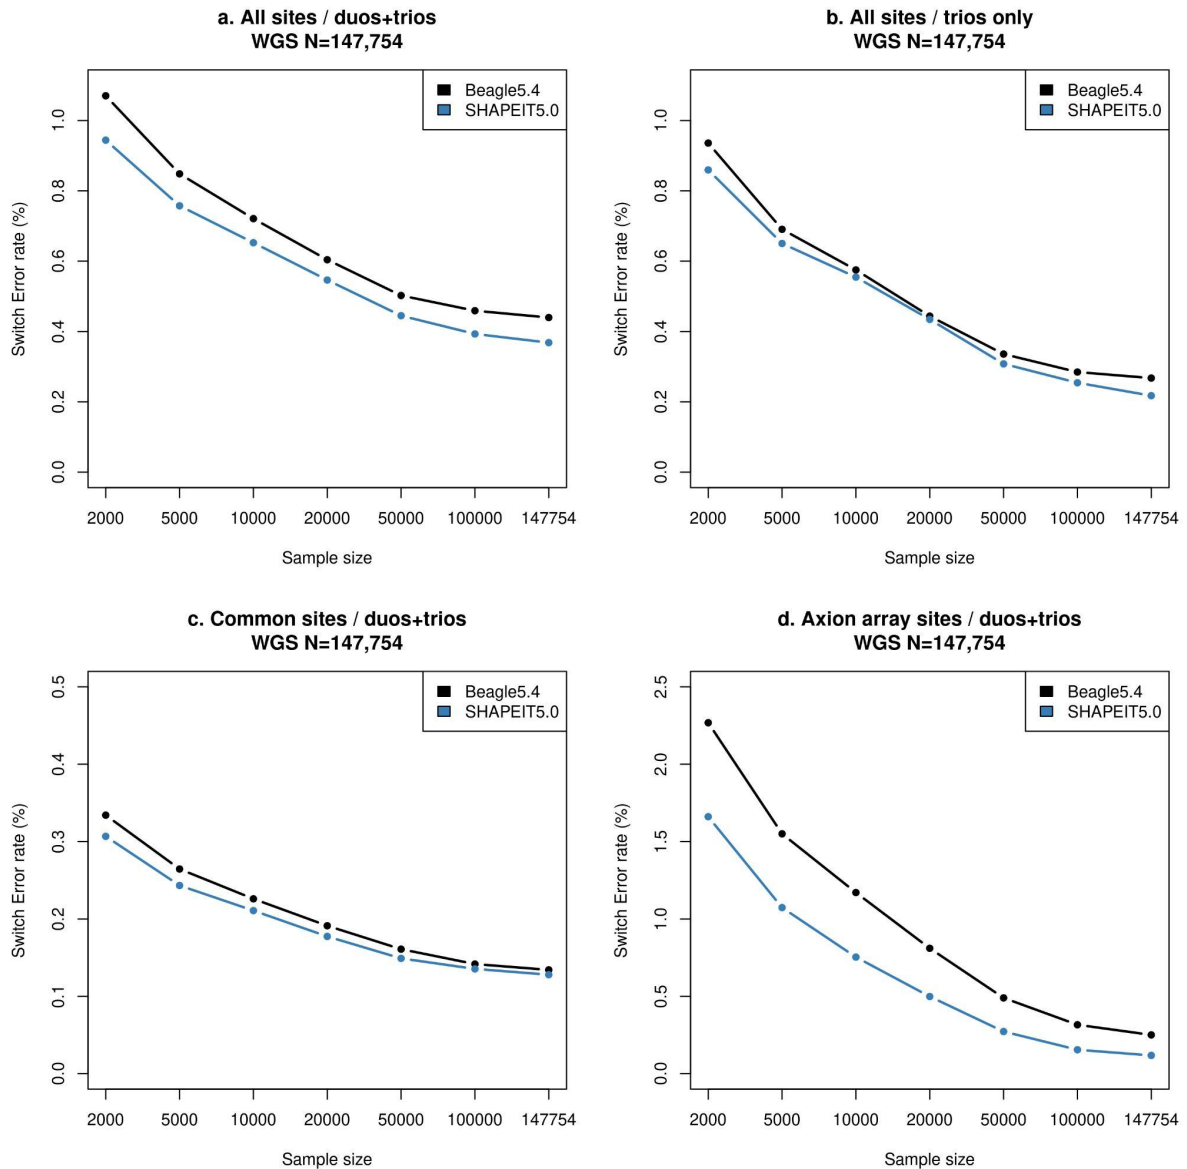

**Supplementary Figure 2: Switch Error rates in the WGS data.**

(A) SER computed at all variants in duos and trios. (B) SER computed at all variants just in trios. (C) SER computed in duos and trios for common variants (MAF  $\geq$  0.1%). (D) SER computed in duos and trios for variants included on the Axiom array. SER was computed for multiple downsampling experiments comprising 2000, 5000, 10000, 20000, 50000, 100000 and 147754 samples (x-axis). SHAPEIT5 and Beagle5.4 are shown in blue and black, respectively.

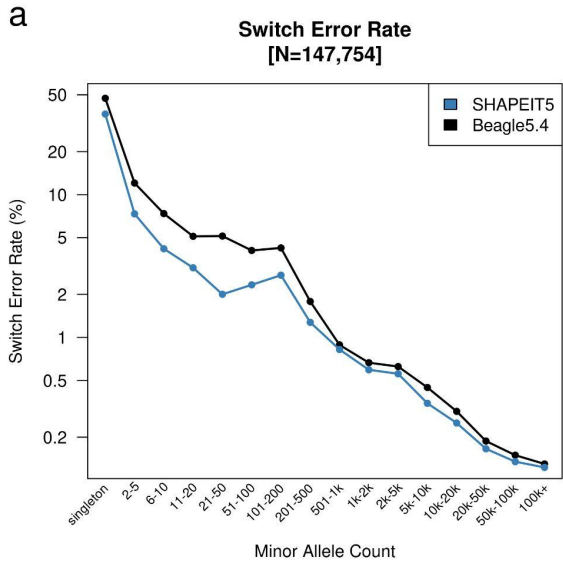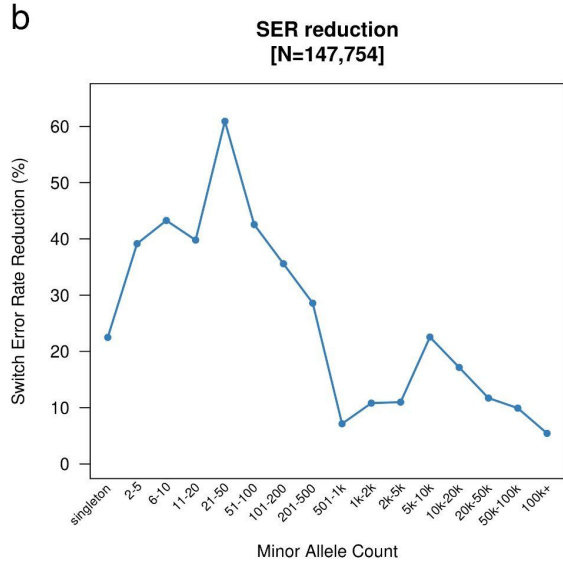

**Supplementary Figure 3: Validation of WGS phasing using trios only.**

(A) SER stratified by minor allele count when using only trios as validation (instead of duos and trios). (B) Corresponding SER reductions. Results for SHAPEIT5 and Beagle5.4 are shown in blue and black, respectively.

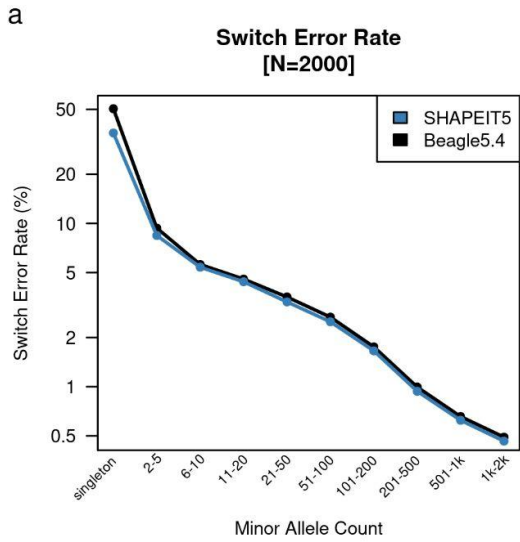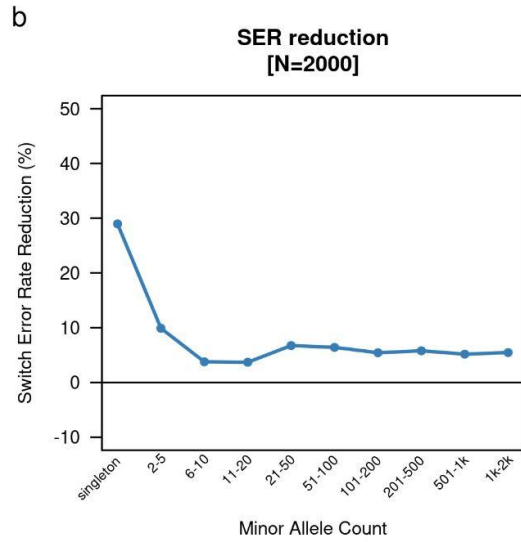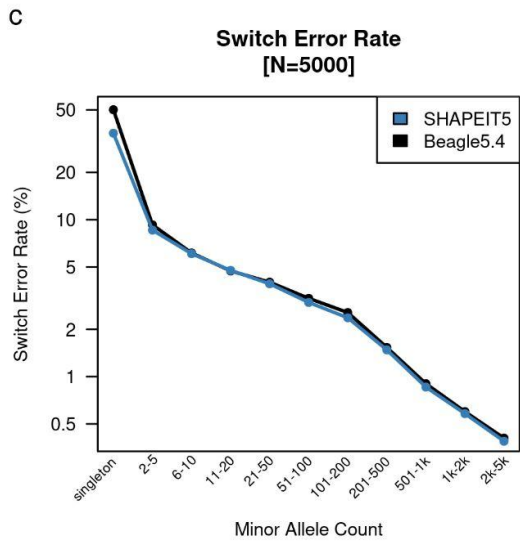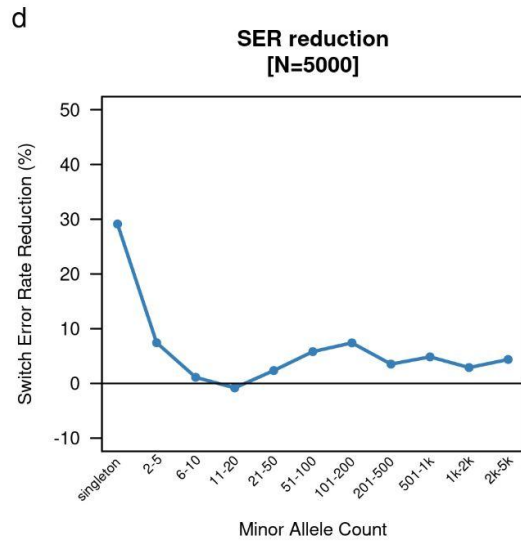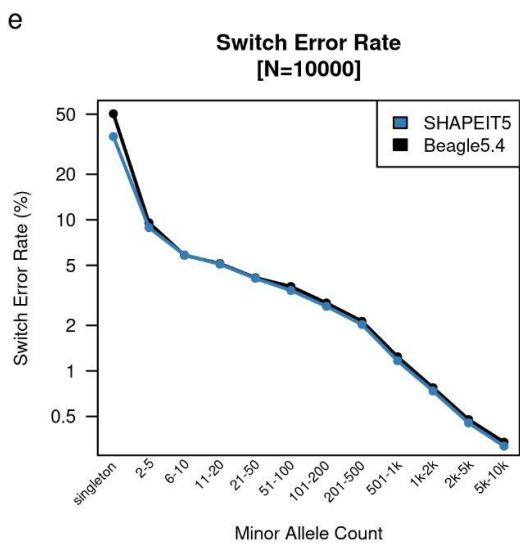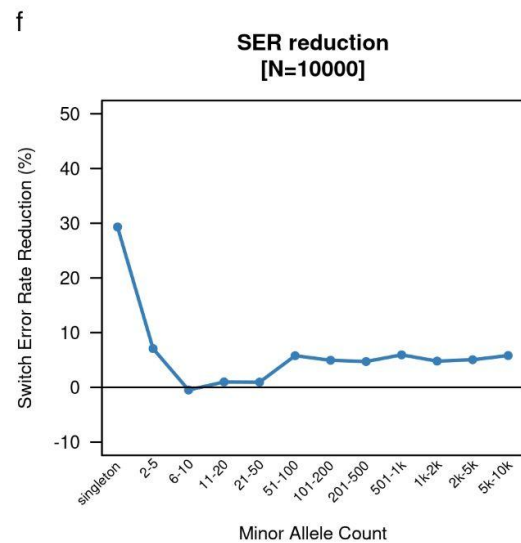

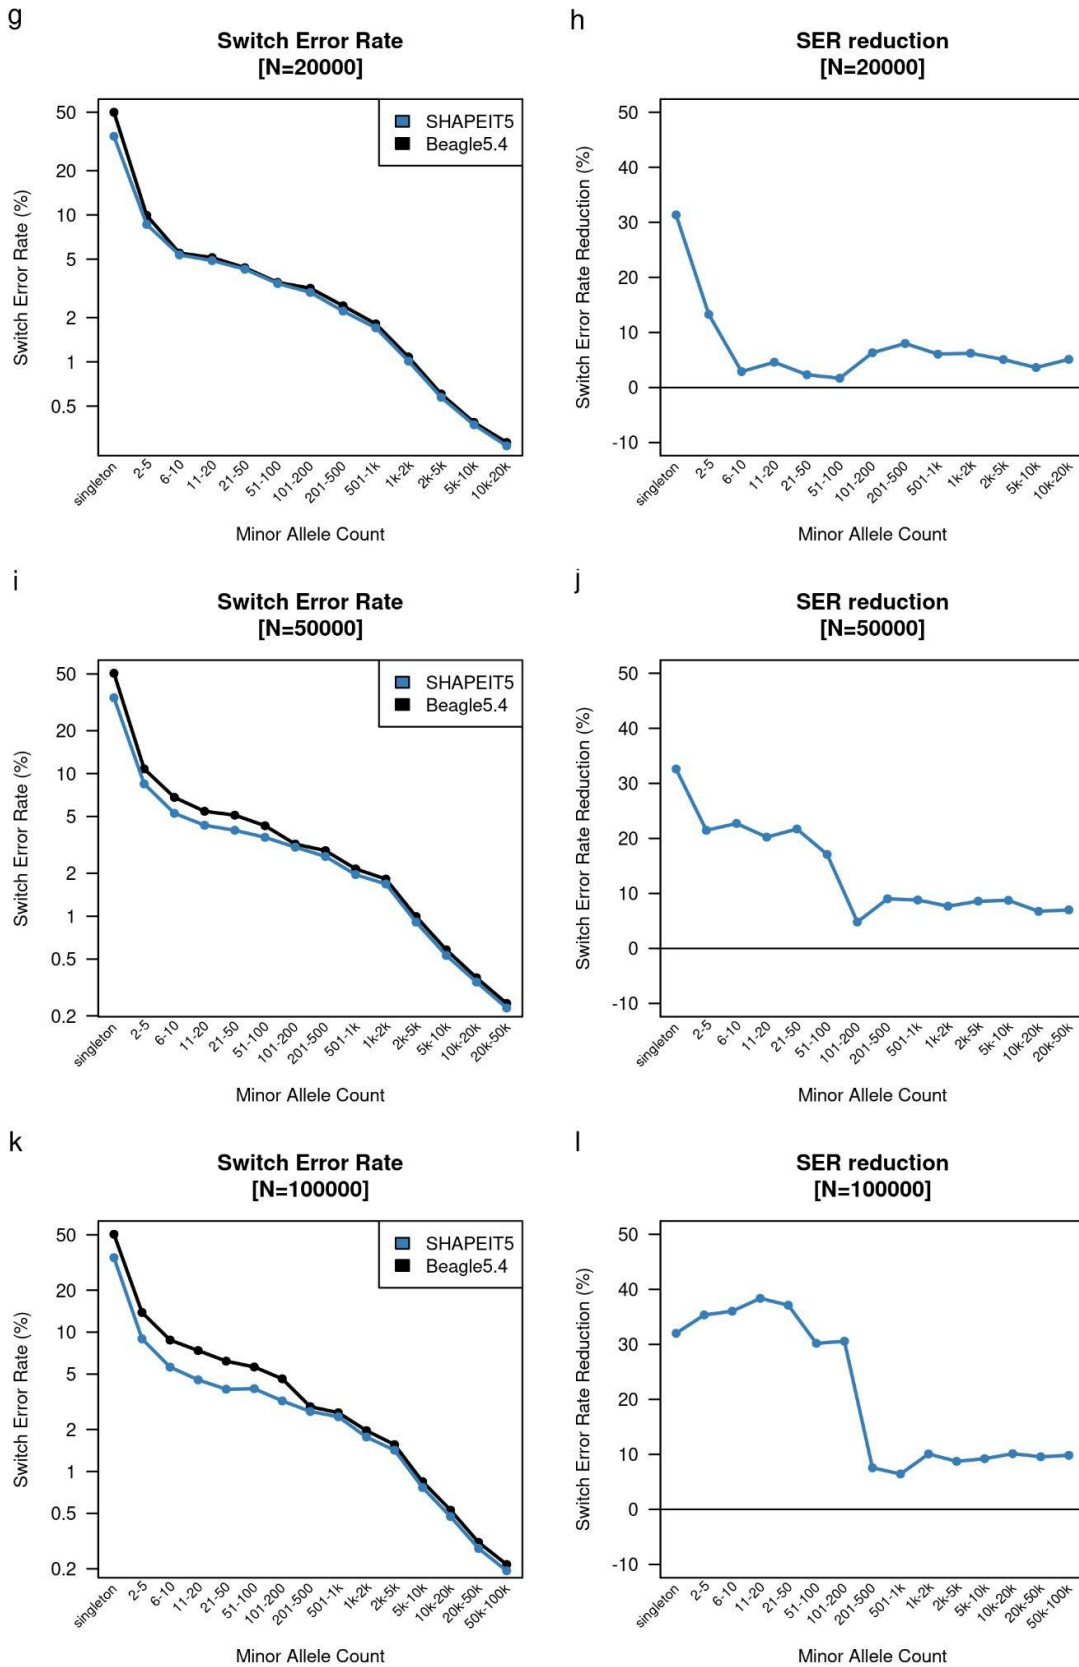

**Supplementary Figure 4: Validation of WGS phasing across multiple sample sizes.** Plots on the left show the SER stratified by minor allele count when using trios and duos as validation for, top to bottom, 2000, 5000, 10000, 20000, 50000, 100000 samples. Results for SHAPEIT5 and Beagle5.4 are shown in blue and black, respectively. Plots on the right show the corresponding SER reductions.

**Supplementary Table 1. Summary statistics of the phased datasets.**

|                                 | SNP array | WES+array  | WGS         | WGS, chr20 |
|---------------------------------|-----------|------------|-------------|------------|
| Number of variants              | 670,741   | 26,199,614 | 603,925,301 | 13,780,190 |
| Number of rare < 0.1%MAF        |           | 25,222,097 | 583,262,899 | 13,304,181 |
| Number of common $\geq$ 0.1%MAF |           | 977,517    | 20,662,402  | 476,009    |
| Number of samples               | 486,442   | 452,644    | 150,119     | 147,754    |
| Number of white British trios   | 897       | 719        | 31          | 31         |
| Number of white British duos    | 4373      | 3104       | 432         | 432        |

**Supplementary Table 2. Running times and cost estimates for phasing WGS data with SHAPEIT5 or Beagle5.4 on the Research Analysis Platform (RAP) of the UK Biobank.**

| Software  | Step                     | Total time  | Time per job | Virtual machine  | Cost on-demand | Cost on-spot |
|-----------|--------------------------|-------------|--------------|------------------|----------------|--------------|
| Beagle5.4 | Phasing all variants     | 24:45       | NA           | mem3_ssd1_v2_x64 | 56.86          | 11.37        |
| Beagle5.4 | Indexing                 | 04:10       | NA           | mem3_ssd1_v2_x8  | 0.96           | 0.19         |
| Beagle5.4 | Total chr20              | 28:55       | NA           | NA               | 57.82          | 11.56        |
| Beagle5.4 | Total whole genome       | 60d, 5:50   | NA           | NA               | 2890           | 578          |
| SHAPEIT5  | Phasing common variants  | 38:52       | 02:26        | mem3_ssd1_v2_x32 | 45.4           | 8.21         |
| SHAPEIT5  | Ligation                 | 01:24       | 01:24        | mem3_ssd1_v2_x2  | 0.10           | 0.02         |
| SHAPEIT5  | Phasing rare variants    | 16:33       | 01:02        | mem3_ssd1_v2_x32 | 19.33          | 3.87         |
| SHAPEIT5  | Concatenating + Indexing | 04:28       | 04:28        | mem3_ssd1_v2_x2  | 0.33           | 0.07         |
| SHAPEIT5  | Total chr20              | 61:17       | 09:20        | NA               | 65.16          | 13.03        |
| SHAPEIT5  | Total whole genome       | 127d, 16:20 | NA           | NA               | 3258           | 651.6        |

**Supplementary Table 3. Running times and memory usage for phasing WGS data with SHAPEIT5 or Beagle5.4 on the Research Analysis Platform (RAP) of the UK Biobank.**

| <b>Software</b> | <b>Step</b>             | <b>Virtual Machine</b> | <b>User time (s)</b> | <b>Elapsed time* (hh:mm:ss)</b> | <b>Memory Usage (Gb)</b> |
|-----------------|-------------------------|------------------------|----------------------|---------------------------------|--------------------------|
| SHAPEIT5        | Phasing common variants | mem3_ssd1_v2_x32       | 3026478              | 38:52                           | 9.31 (149)**             |
| SHAPEIT5        | Phasing rare variants   | mem3_ssd1_v2_x32       | 681317               | 16:33                           | 22.7 (364)**             |
| Beagle5.4       | Phasing all variants    | mem3_ssd1_v2_x64       | 4647342              | 24:45                           | 501***                   |

(\*) Elapsed time on the corresponding Virtual machine

(\*\*) Average memory usage of SHAPEIT5 per 4Mb chunk of data and sum over all chunks is given in brackets.

(\*\*\*) Memory usage of Beagle5.4 is given for the whole chromosome 20 when run with *java -Xmx460G*.
